# Supplementary material
Source: PubMed Central journal article supplement (PMC8443335)
Supplement: mmc1.pdf [file mmc1.pdf]

**Supplemental information**

**Hyperglycemia in acute COVID-19  
is characterized by insulin resistance  
and adipose tissue infectivity by SARS-CoV-2**

**Moritz Reiterer, Mangala Rajan, Nicolás Gómez-Banoy, Jennifer D. Lau, Luis G. Gomez-Escobar, Lunkun Ma, Ankit Gilani, Sergio Alvarez-Mulett, Evan T. Sholle, Vasuretha Chandar, Yaron Bram, Katherine Hoffman, Priya Bhardwaj, Phoebe Piloco, Alfonso Rubio-Navarro, Skyler Uhl, Lucia Carrau, Sean Houhgton, David Redmond, Alpana P. Shukla, Parag Goyal, Kristy A. Brown, Benjamin R. tenOever, Laura C. Alonso, Robert E. Schwartz, Edward J. Schenck, Monika M. Safford, and James C. Lo**

**Supplemental information**

**Hyperglycemia in acute COVID-19  
is characterized by insulin resistance  
and adipose tissue infectivity by SARS-CoV-2**

**Moritz Reiterer, Mangala Rajan, Nicolás Gómez-Banoy, Jennifer D. Lau, Luis G. Gomez-Escobar, Lunkun Ma, Ankit Gilani, Sergio Alvarez-Mulett, Evan T. Sholle, Vasuretha Chandar, Yaron Bram, Katherine Hoffman, Priya Bhardwaj, Phoebe Piloco, Alfonso Rubio-Navarro, Skyler Uhl, Lucia Carrau, Sean Houhgton, David Redmond, Alpana P. Shukla, Parag Goyal, Kristy A. Brown, Benjamin R. tenOever, Laura C. Alonso, Robert E. Schwartz, Edward J. Schenck, Monika M. Safford, and James C. Lo**

Figure S1, related to Figure 1. Characteristics of the plasma-sampled sub-cohorts.

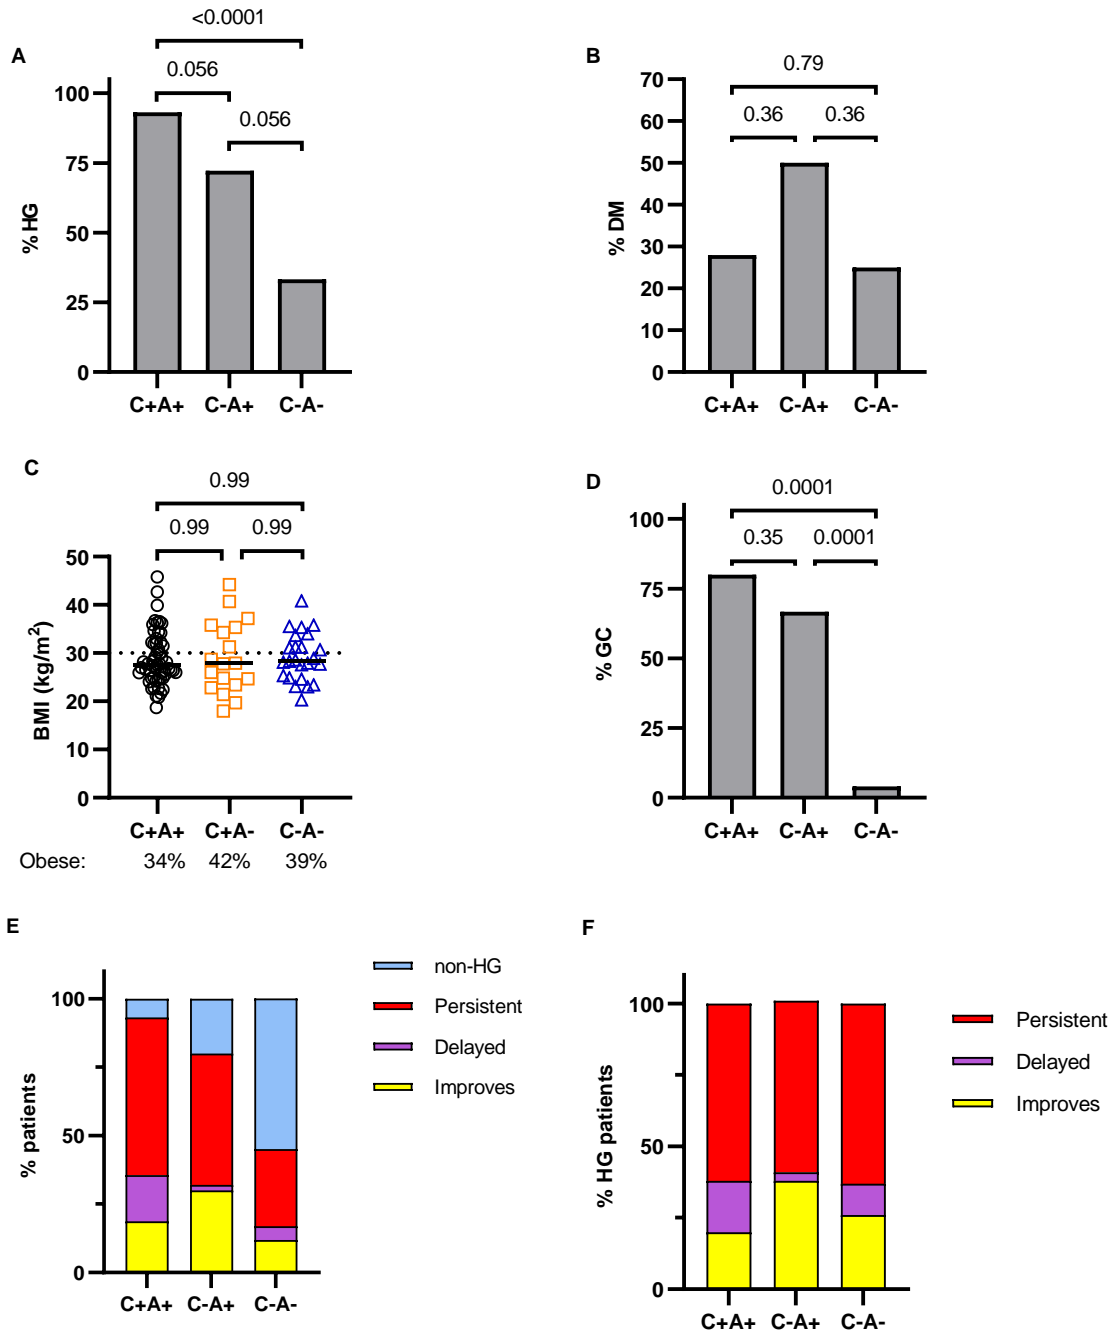

**Figure S1, related to Figure 1. Characteristics of the plasma-sampled sub-cohorts.**

**(A and B)** Percentage of patients with hyperglycemia (HG) **(A)** and diabetes **(B)** among plasma sampled patients with COVID-19 and ARDS+ (C+A+,  $n = 59$ ) and ICU controls with (C-A+,  $n = 18$ ) or without ARDS (C-A-,  $n = 24$ ). Data were analyzed by two-sided Fisher's exact test with Bonferroni-Holm's correction for multiple comparisons.

**(C)** BMI of patients with COVID-19 and ARDS (C+A+,  $n = 59$ ) and ICU controls with (C-A+,  $n = 18$ ) or without ARDS (C-A-,  $n = 24$ ). Data were analyzed by Kruskal-Wallis test with Dunn's test corrected for multiple comparisons (Bonferroni-Holm).

**(D)** Percentage of patients who received glucocorticoid (GC) treatment among plasma sampled patients with COVID-19 and ARDS (C+A+,  $n = 59$ ) and ICU controls with (C-A+,  $n = 18$ ) or without ARDS (C-A-,  $n = 24$ ). Data were analyzed by two-sided Fisher's Exact Test with Bonferroni-Holm's correction for multiple comparisons.

**(E and F)** Change in hyperglycemia over time: Percentage of patients who never suffer from HG, display HG throughout their hospital stay ("persistent"), develop HG after at least one week without HG ("delayed"), display HG initially but return to normal glucose levels for at least a week before discharge ("improves") (C+A+  $n = 59$ , C-A+  $n = 50$ , C-A-  $n = 202$  patients). **(F)** Data from **(E)** considering only patients with HG.

Figure S2, related to Figure 2. Distribution of C-peptide and glucose readings.

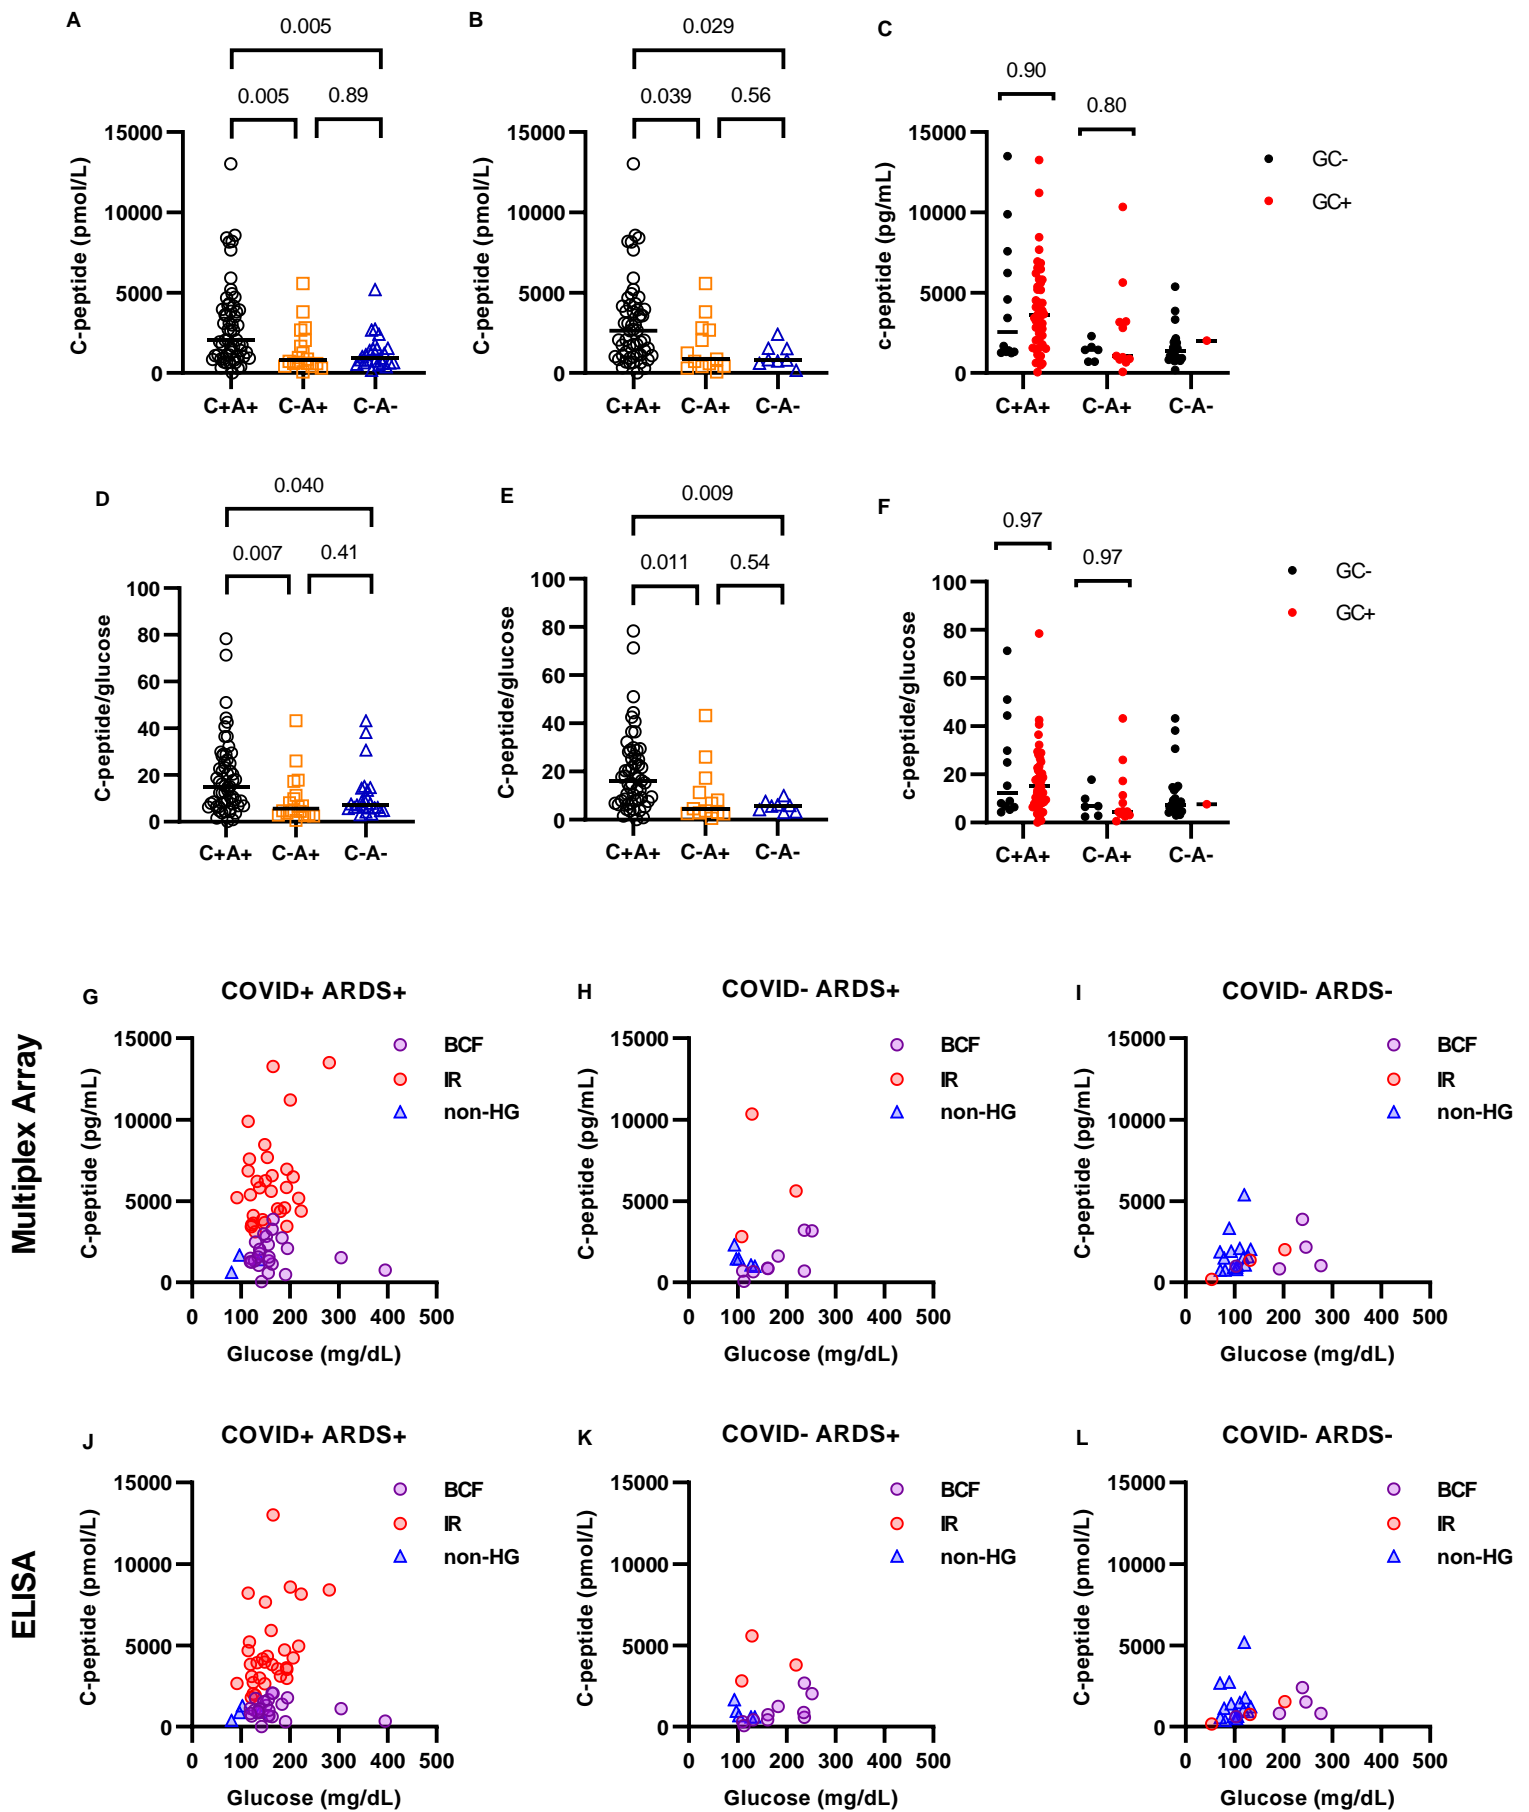

**Figure S2, related to Figure 2. Distribution of C-peptide and glucose readings.**

**(A)** C-peptide concentration in the plasma of patients with COVID-19 and ARDS (C+A+,  $n = 59$ ), ICU controls with ARDS (C-A+,  $n = 18$ ), and without ARDS (C-A-,  $n = 24$ ), measured by ELISA. Data were analyzed using Kruskal-Wallis and Dunn's tests with multiple comparison correction (Bonferroni-Holm).

**(B)**, C-peptide concentration in the plasma of patients and controls with hyperglycemia (C+A+  $n = 55$ , C-A+  $n = 13$ , C-A-  $n = 8$ ), measured by ELISA. Data were analyzed using Kruskal-Wallis and Dunn's tests with multiple comparison correction (Bonferroni-Holm).

**(C)** C-peptide concentration in the plasma of patients in each of the groups: C+A+ ( $n = 59$ ), C-A+ ( $n = 18$ ), and C-A- ( $n = 24$ ), subdivided according to whether they received glucocorticoids (GC) during their hospital stay, measured by Multiplex Protein Array. C+A+ and C-A+ data were analyzed using Mann-Whitney's tests with Holm-Šídák's multiple comparison correction. Statistical analysis of C-A- was not possible since only 1 patient in this group received GC.

**(D and E)** C-peptide/glucose ratio of all patients with COVID-19 and ARDS and control groups **(D)** or only those with hyperglycemia **(E)**, C-peptide measured by ELISA. Data were analyzed using Kruskal-Wallis and Dunn's tests with multiple comparison correction (Bonferroni-Holm).

**(F)** C-peptide/glucose ratio of patients in the following groups: C+A+ ( $n = 59$ ), C-A+ ( $n = 18$ ), and C-A- ( $n=24$ ), subdivided according to whether they received GC during their hospital stay, measured by Multiplex Protein Array. C+A+ and C-A+ data were analyzed using Mann-Whitney's tests with Holm-Šídák's multiple comparison correction. Statistical analysis of C-A- was not possible since only 1 patient in this group received GC.

**(G – L)** Glucose at plasma collection time was plotted against C-peptide concentration in the plasma, measured by Multiplex Protein Array **(G – I)** or ELISA **(J – L)**, for patients in the following groups: C+A+ **(G and J,  $n = 59$ )**, C-A+ **(H and I,  $n = 18$ )**, and C-A- **(J and L,  $n = 24$ )**. Each data point is colored according to their glycemic subgroup: non-hyperglycemic (non-HG), insulin resistant (IR), beta cell failure (BCF).

**Figure S3, related to Figure 2. Statistical analysis of insulin resistance and beta cell failure among patients with COVID and ARDS, and ICU controls with or without ARDS**

**A**

|      | no DM |    | DM  |    |  |       |
|------|-------|----|-----|----|--|-------|
|      | BCF   | IR | BCF | IR |  | p     |
| C+A+ | 10    | 28 | 11  | 6  |  | 0.015 |
| C-A+ | 2     | 3  | 8   | 0  |  | 0.035 |
| C-A- | 1     | 2  | 5   | 0  |  | 0.11  |

|      | non-Ob |    | Ob  |    |  |      |
|------|--------|----|-----|----|--|------|
|      | BCF    | IR | BCF | IR |  |      |
| C+A+ | 15     | 20 | 6   | 14 |  | 0.4  |
| C-A+ | 4      | 2  | 6   | 1  |  | 0.56 |
| C-A- | 3      | 0  | 3   | 2  |  | 0.46 |

|      | No Gc |    | Gc  |    |  |      |
|------|-------|----|-----|----|--|------|
|      | BCF   | IR | BCF | IR |  |      |
| C+A+ | 3     | 7  | 18  | 27 |  | 0.72 |
| C-A+ | 3     | 0  | 7   | 3  |  | 0.53 |
| C-A- | 5     | 2  | 1   | 0  |  | 0.99 |

**B**

**Model 1: Logistic regression with 3 levels: no hyperglycemia, insulin resistance, and beta cell failure with group 3 (C- A-) as reference.**

| Outcome – Insulin resistance        | OR (95% CI)       | P-value |
|-------------------------------------|-------------------|---------|
| Group 2 (C- A+) vs. Group 3 (C- A-) | 1.84 (0.33-10.47) | 0.487   |
| Group 1 (C+ A+) vs. Group 3 (C- A-) | 15.1 (3.4-81.3)   | 0.000   |
| Outcome – Beta cell failure         | OR (95% CI)       | P-value |
| Group 2 (C- A+) vs. Group 3 (C- A-) | 1.24 (0.21-7.22)  | 0.813   |
| Group 1 (C+ A+) vs. Group 3 (C- A-) | 0.61 (0.13-2.94)  | 0.537   |
| Diagnosed Diabetes                  | 12.6 (4.7-37.7)   | 0.000   |
| Glucocorticoid Administration       | 3.6 (1.15-12.32)  | 0.032   |

**Model 2: Logistic regression with 3 levels: no hyperglycemia, insulin resistance, and beta cell failure with group 2 (C- A+) as reference.**

| Outcome – Insulin resistance        | OR (95% CI)        | P-value |
|-------------------------------------|--------------------|---------|
| Group 3 (C- A-) vs. Group 2 (C- A+) | 0.55 (0.10-3.02)   | 0.487   |
| Group 1 (C+ A+) vs. Group 2 (C- A+) | 8.25 (1.73-42.85)  | 0.009   |
| Outcome – Beta cell failure         |                    |         |
| Group 3 (C- A-) vs. Group 2 (C- A+) | 0.81 (0.14- 4.75)  | 0.813   |
| Group 1 (C+ A+) vs. Group 2 (C- A+) | 0.49 (0.14- 1.79)  | 0.279   |
| Diagnosed Diabetes                  | 12.64 (4.72 37.67) | 0.000   |
| Glucocorticoid Administration       | 3.64 (1.15- 12.32) | 0.032   |

**Figure S3, related to Figure 2. Statistical analysis of insulin resistance and beta cell failure among patients with COVID and ARDS, and ICU controls with or without ARDS.**

**(A)** Association between insulin resistance (IR)/beta cell failure (BCF) and diabetes (DM), obesity (Ob), and glucocorticoid treatment (Gc). Association was tested using Fisher's exact test for individuals classed as either IR or BCF among patients with COVID-19 and ARDS (C+A+,  $n = 55$ ), ICU controls with ARDS (C-A+,  $n = 13$ ), and without ARDS (C-A-,  $n = 8$ ).

**(B)** Logistic regression adjusting for diagnosed diabetes and glucocorticoid use. Models with a three level ordinal outcome (0 = no hyperglycemia, 1 = insulin resistance and 2 = beta cell failure). We fitted a partial proportional odds model assuming given nonproportionality only in the group variable and proportionality of odds for all the additional covariates such as Diagnosed Diabetes and Glucocorticoid usage, which were treated as confounders in the model.



Figure S4, related to Figure 3. Glucoregulatory hormone profile in COVID-19.

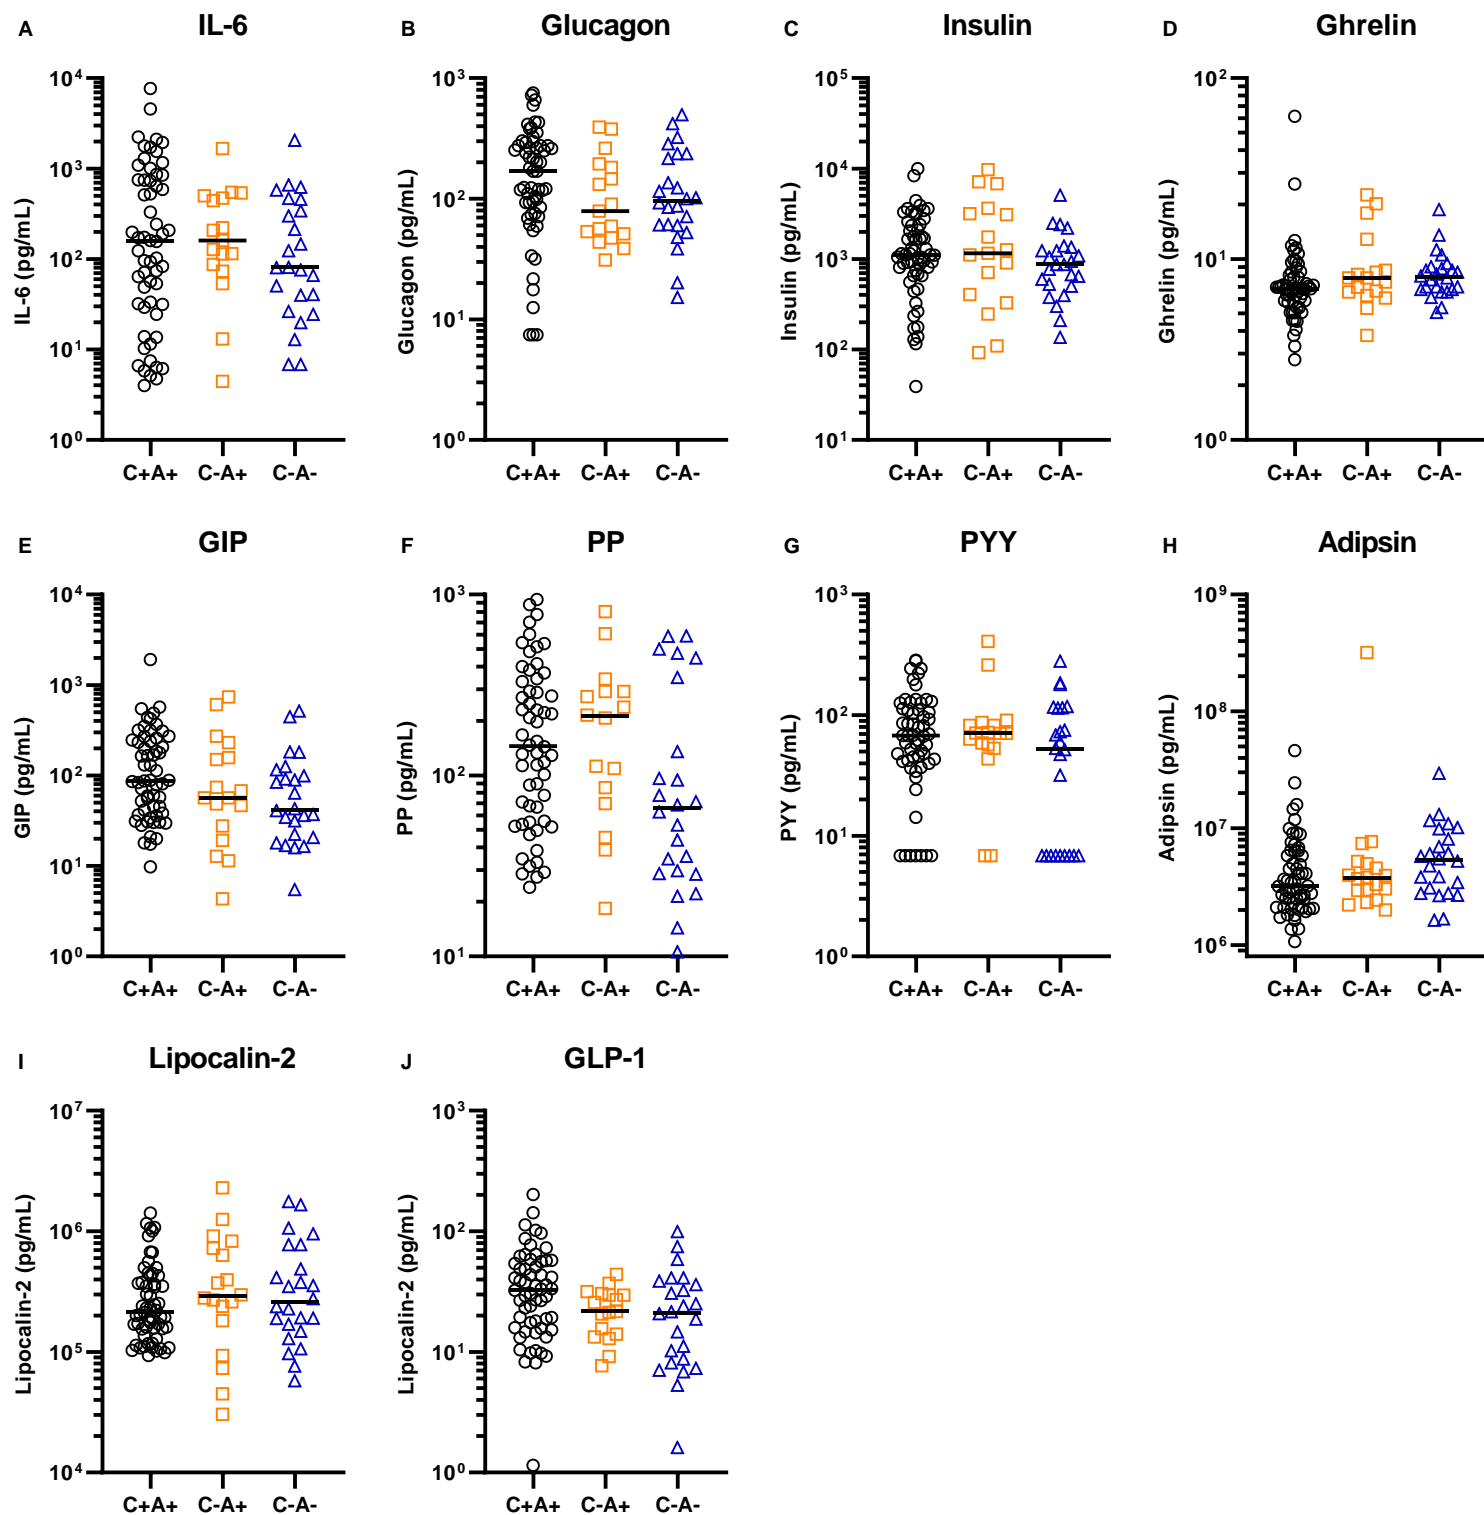

**Figure S4, related to Figure 3. Glucoregulatory hormone profile in COVID-19.**

**(A – J)** Plasma from patients with COVID-19 and ARDS (C+A+,  $n = 59$ ) and ICU control with ARDS (C-A+,  $n = 18$ ) and without ARDS (C-A-,  $n = 24$ ) was analyzed by multiplex metabolic protein array, targeting hormones known to modulate blood glucose homeostasis. The data were analyzed using Kruskal-Wallis tests. All targets with  $P > 0.05$  in either Kruskal-Wallis or all Dunn's tests are shown here.

Figure S5, related to Figure 3. Metabolic hormone analysis of COVID-19 patients split by glycemic subgroup.

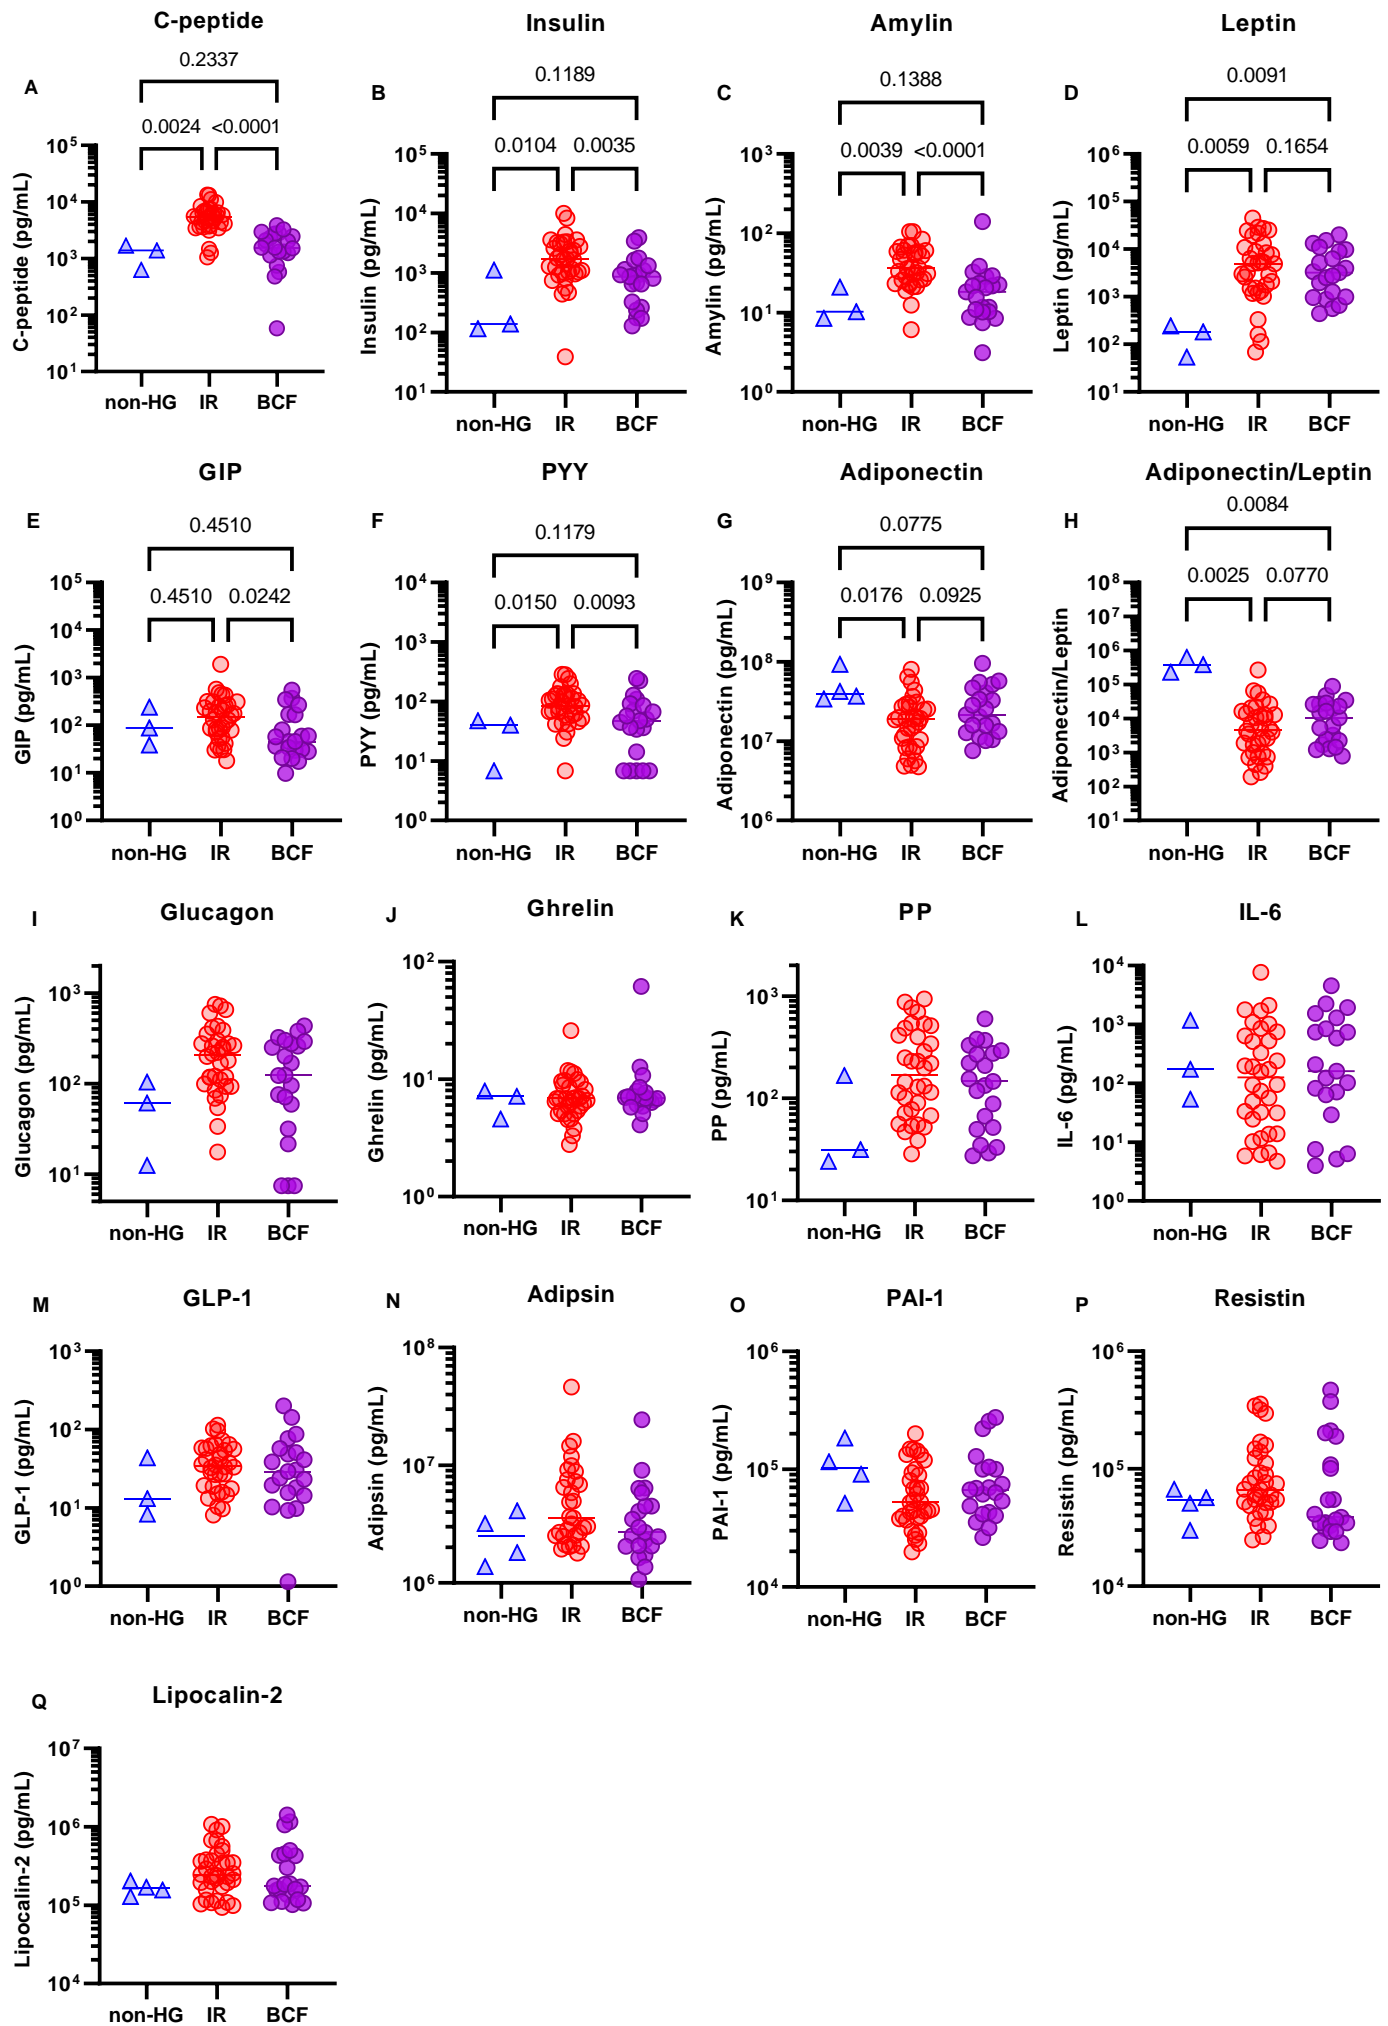

**Figure S5, related to Figure 3. Metabolic hormone analysis of COVID-19 patients split by glycemic subgroup.**

**(A – Q)** Metabolic hormone readings of patients with COVID-19 were subdivided according to the glycemic subcategory assigned to each patient: non-hyperglycemic (non-HG), insulin resistant (IR), beta cell failure (BCF). The data were analyzed using Kruskal-Wallis tests. All targets with  $P < 0.05$  **(A-H)** were subjected to Dunn's tests with multiple comparison correction (Bonferroni-Holm).

Figure S6, related to Figure 4. Altered gene expression following infection with SARS-CoV-2.

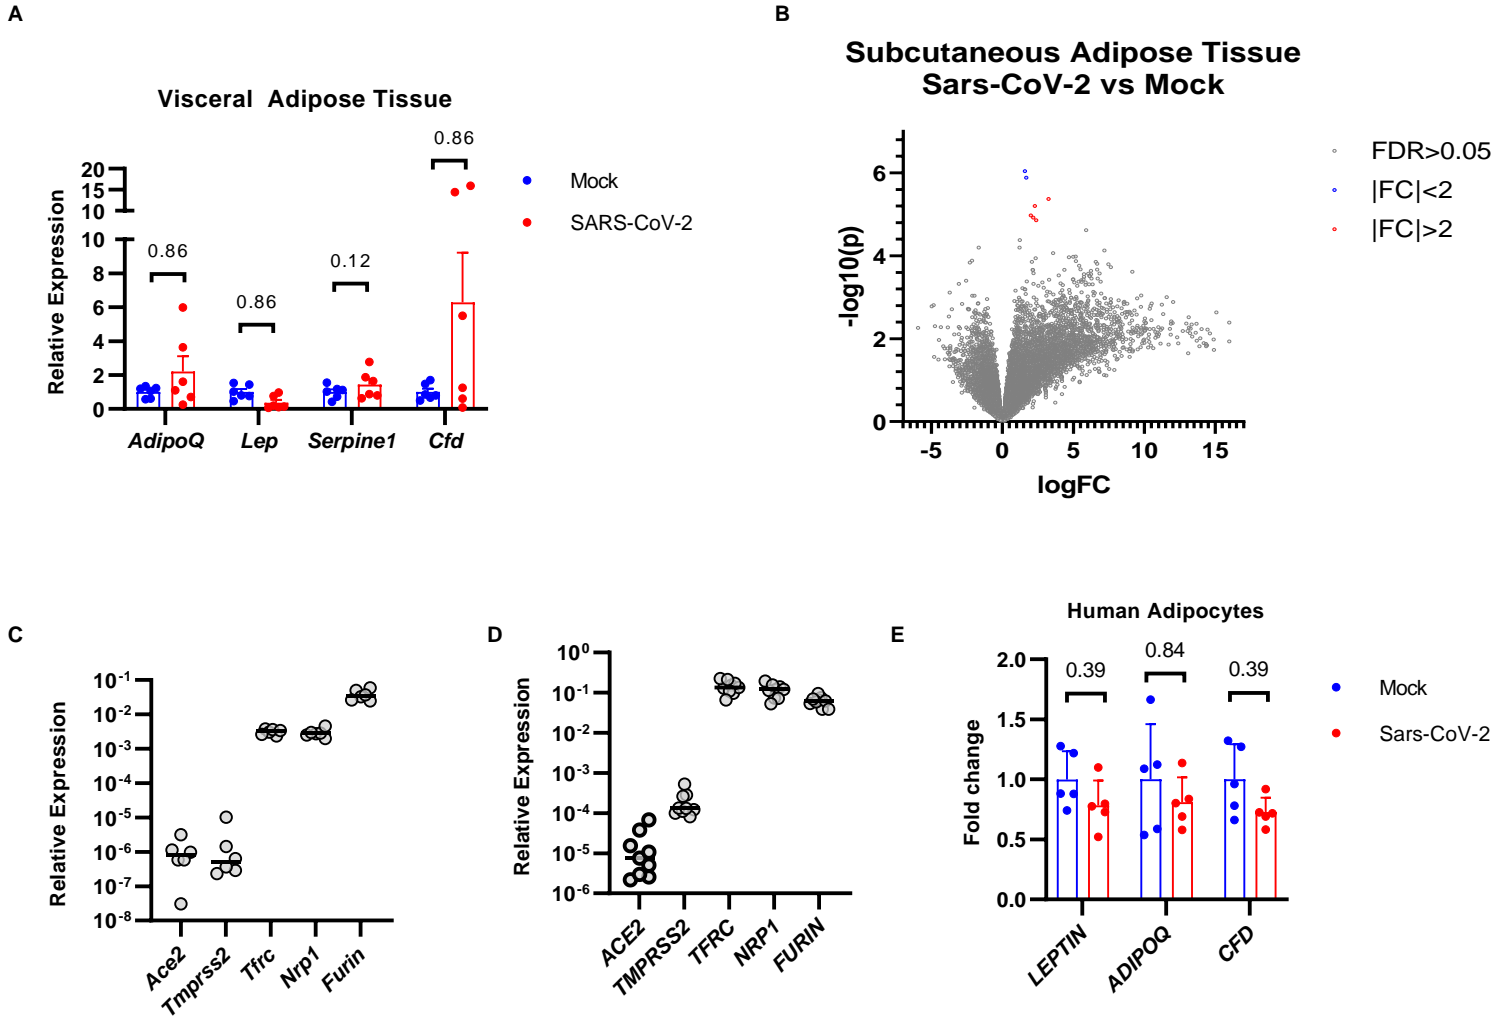

**Figure S6, related to Figure 4. Altered gene expression following infection with SARS-CoV-2.**

**(A)** RT-qPCR of mRNA from visceral fat tissue of Syrian hamsters infected with SARS-CoV-2 or mock virus. Data were analyzed using Mann-Whitney tests with Holm-Sidak's multiple comparisons correction ( $n = 6$  hamsters per group).

**(B)** Volcano plot comparing gene expression in subcutaneous adipose tissue following SARS-CoV-2 or mock infection ( $n = 6$  hamsters per group), no genes were  $FDR < 0.01$ .

**(C and D)** RT-qPCR for known SARS-CoV-2 entry factors in 3T3-L1 adipocytes ( $n = 6$ ) **(C)** and human adipocytes ( $n = 9$ ) **(D)**, expression relative to Rps18 housekeeping gene.

**(E)** RT-qPCR of mRNA from human adipocytes infected with SARS-CoV-2 or mock virus. Data were analyzed using Mann-Whitney tests with Holm-Sidak's multiple comparisons correction ( $n = 5$  per group).

**Table S1, related to Key Resources Table: Primer oligonucleotide sequences**

Hamster:

|                 | Forward               | Reverse               | Source     |
|-----------------|-----------------------|-----------------------|------------|
| <b>Adipoq</b>   | AGGCTAAGCACCCCAAGAATC | AGTTGTGGAGACCAGGGAATG | This paper |
| <b>Cfd</b>      | CGGCTGTACGACGTGCAAA   | CACGTAGGGTCCCAGAGACA  | This paper |
| <b>Leptin</b>   | AAATGTGCTGGAGACCCCTG  | TACCGACTGCGTGTGTGAAA  | This paper |
| <b>Rps18</b>    | AAGGGCCATGCGTCACTTC   | TGTTGGTGTGAGGACTCGC   | This paper |
| <b>Serpine1</b> | AAGAAAGTGCCTCTCTCCGC  | AGACTTGTGAAGTCGGCCTG  | This paper |
| <b>Gapdh</b>    | ACCACAGTCCATGCCATC    | CCTGCTTACCACCTTCT     | This paper |

Human:

|                | Forward                  | Reverse                 | Source                         |
|----------------|--------------------------|-------------------------|--------------------------------|
| <b>36B4</b>    | GTGATGTGCAGCTGATCAAGACT  | GATGACCAGCCCAAAGGAGA    | Magkos <i>et al.</i> , 2016    |
| <b>ACE2</b>    | GGGATCAGAGATCGGAAGAAGAAA | AGGAGGTCTGAACATCATCAGTG | Wing <i>et al.</i> , 2021      |
| <b>ADIPOQ</b>  | GGCTGGGCCATCTCCTCCTCA    | ACAGCTCCCAGCAACAGCATCC  | This paper                     |
| <b>CFD</b>     | GACACCATCGACCACGACC      | GCCACGTCGCAGAGAGTTC     | Jovanović <i>et al.</i> , 2016 |
| <b>FURIN</b>   | GCCACATGACTACTCCGCAGAT   | TACGAGGGTGAACCTGGTCAGC  | This paper                     |
| <b>GAPDH</b>   | TTCTTTTTCGTCGCCAGCCGA    | GTGACCAGGCGCCCAATAGA    | Gucalp <i>et al.</i> , 2018    |
| <b>LEPTIN</b>  | AGATCCTCACCAGTATGCCTT    | CTCTGTGGAGTAGCCTGAAGC   | Baranova <i>et al.</i> , 2006  |
| <b>NRP1</b>    | AACAACGGCTCGGACTGGAAGA   | GGTAGATCCTGATGAATCGCGTG | This paper                     |
| <b>TFRC</b>    | ATCGGTTGGTGCCACTGAATGG   | ACAACAGTGGGCTGGCAGAAAC  | This paper                     |
| <b>TMPRSS2</b> | AATCGGTGTGTTGCCTCTAC     | CGTAGTTCTCGTCCAGTCGT    | Wilson <i>et al.</i> , 2005    |

Mouse:

|                | Forward                | Reverse                 | Source                        |
|----------------|------------------------|-------------------------|-------------------------------|
| <b>Ace2</b>    | GGAGGTGGATGGTCTTTCGG   | AACGATCTCCCCTTCATCTC    | This paper                    |
| <b>Adipoq</b>  | GCACTGGCAAGTTCTACTGCAA | GTAGGTGAAGAGAACGGCCTTGT | This paper                    |
| <b>Cfd</b>     | CGTACCATGACGGGGTAGTC   | ATCCGGTAGGATGACACTCG    | Nakamura <i>et al.</i> , 2019 |
| <b>Furin</b>   | TAGCAGGCAATTATGACCCTGG | TAAGTACACCTACGCCACAG    | This paper                    |
| <b>Nrp1</b>    | GGCTGTGAAGTGGAAGCACC   | AGTGGTGCCTCCTGTGAGC     | This paper                    |
| <b>Rps18</b>   | CATGCAGAACCCACGACAGTA  | CCTCACGCAGCTTGTGTCTA    | This paper                    |
| <b>Tfrc</b>    | GTGGAGTATCACTTCTGTGCGC | CCCAGAAGATATGTCGGAAAGG  | This paper                    |
| <b>Tmprss2</b> | TCGTGTACTIONGGAGCGGAC  | GATTCCTGGAGGTGACCCTGAG  | This paper                    |

Other:

|                         |                               |            |
|-------------------------|-------------------------------|------------|
| <b>SARS-CoV-2-TRS-L</b> | CTCTTGATAGATCTGTTCTCTAAACGAAC | This paper |
| <b>SARS-CoV-2-TRS-N</b> | GGTCCACCAAACGTAATGCG          |            |
